# Supplementary material for: Anti-Inflammatory Drugs Remodel the Tumor Immune Environment to Enhance Immune Checkpoint Blockade Efficacy
Source: Oxford University Press journal article supplement (doi:10.1158/2159-8290.cd-20-1815), 2021-05-24
Supplement: 21598290cd201815-sup-257516_2_supp_7056878_qrnz2g.xlsx [file 21598290cd201815-sup-257516_2_supp_7056878_qrnz2g.xlsx]

## Sheet: Fig2_Bilateral_Concordance
Treatment	Mice per group	Complete responders, CR (response in both flanks)	Progressive disease, PD (no response)	Stable disease, SD (response in a single flank)	Concordance between both flanks (%)
Vehicle	5	0	5	0	100
Anti-PD-1	9	2	6	1	89
Anti-PD-1 & CXB	9	5	2	2	78
				Average concordance across treatment groups	89

## Sheet: Fig4_CI_CP_genelist
Cancer Inhibitory (CI) genes	Cancer Promoting (CP) genes	COX-IS (CP)	COX-IS (CI)
Ccl5	Ptgs2	Cxcl1	Cd8
Cd274	Il6	Cxcl2	Cxcl11
Pdcd1	Vegfa	Il1b	Cxcl10
Cd4		Il6	Cxcl9
Cd8		Ptgs2	Eomes
Clec9a		Vegfa	Gzmb
Cxcl10			Ifng
Cxcl9			Prf1
Eomes			Stat1
Gzmb
Ifit1
Ifng
Il12b
Ncr1
Nkg7
Prf1
Stat1
Tbx21
Tnfa
Xcl1
